# Supplementary material for: The HDAC7–TET2 epigenetic axis is essential during early B lymphocyte development
Source: PubMed Central journal article supplement (PMC9410891; doi:10.1093/nar/gkac619), 2022-07-29
Supplement: gkac619_supplemental_file.pdf [file gkac619_supplemental_file.pdf]

## **Supplementary Information**

### **The HDAC7-TET2 epigenetic axis is essential during early B lymphocyte development**

**Alba Azagra, Ainara Meler, Oriol de Barrios, Laureano Tomás-Daza, Olga Collazo, Beatriz Monterde, Mireia Obiols, Llorenç Rovirosa, Maria Vila-Casadesús, Mónica Cabrera-Pasadas, Mar Gusi-Vives, Thomas Graf, Ignacio Varela, José Luis Sardina, Biola M Javierre, and Maribel Parra**

## Supplementary Figure Legends

### Supplementary Figure 1. HDAC7 deficiency results in global chromatin decondensation and increase 5-hmC levels

(A) Flow cytometry plots showing the gating strategy to sort pro-B (IgM<sup>-</sup>, CD19<sup>+</sup>, B220<sup>-</sup>, CD43<sup>+</sup>) and pre-B cells (IgM<sup>-</sup>, CD19<sup>+</sup>, B220<sup>-</sup>, CD43<sup>-</sup>) from the bone marrow of control and *Hdac7<sup>fl/-</sup>* conditional mice. (B) Schematic representation of up-regulated and down-regulated genes between different cell types and conditions of the RNA sequencing experiment in Figures 1B-E. (C) Heat map showing most down-regulated genes in *Hdac7<sup>fl/-</sup>* pro-B and pre-B cells compared to control cells (left panel). Absolute expression of *Igkv4-40*, *Igkv4-55* and *Igkv4-57-1* genes in HDAC7-deficient pro-B and pre-B cells versus control counterpart cells, using data from RNA-seq (right panel). Quantification values shown are expressed in FPKM values. (D) Gene ontology (GO) analysis of down-regulated genes in HDAC7 deficient pro-B and pre-B cells versus control pro-B cells. (E) BP ontology analysis of up-regulated genes in HDAC7-deficient pro-B and pre-B cells compared to control pro-B cells. (F) MF ontology analysis of up-regulated genes in HDAC7-deficient pro-B and pre-B cells compared to control pro-B cells. MF and BP correspond to Molecular Function and Biological Process, respectively.

### Supplementary Figure 2. HDAC7 controls DNA 5-hmC through *Tet2* regulation in pro-B and pre-B cells.

(A) *Tet1* and *Tet3* expression profiles in hematopoietic cells subsets. Data were obtained from the Immunological Genome Project (Immgen) database. (B) Heat map showing the expression of *Hdac7*, *Tet1*, *Tet2* and *Tet3* in different hematopoietic cell types. Data was obtained from Immgen database using “My Gene set” tool. (C) Analysis by RT-qPCR of *Tet1*, *Tet2* and *Tet3* mRNA levels in bone marrow from wild-type and HDAC7-deficient pro-B cells and in Cd11b<sup>+</sup> cells. (D) RNA-seq signal profiles for *Pax5* gene of HDAC7-deficient pro-B and pre-B cells, and control pro-B cells. Orange shadow highlights *Pax5* promoter region. (E) Analysis by RT-qPCR of *E2a* and *Pax5* genes in pro-B and pre-B cells from wild-type and HDAC7-deficient mice. (F) As in (E), but for *Hdac4*, *Hdac5* and *Hdac9* genes. Data from panels C, E and F are represented as mean of n=3 ± SEM; unpaired t test were used to determine significance (\*p<0.05, \*\*p<0.01).

### Supplementary Figure 3. *Tet2* is a direct HDAC7 target gene in pro-B and pre-B cells

(A) ATAC-seq signal profile of HDAC7-deficient and control pro-B cells over the transcription factor *Pax5* genomic sequence. (B) Venn Diagram comparing genes enriched in H3K9/K14ac ChIP-seq epigenetic mark and genes detected as open regions by ATAC-seq in *Hdac7<sup>fl/-</sup>* pro-B cells compared to control pro-B cells. *Tet2* is included among the subset of overlapping genes. (C) Depth coverage of H3K27ac peaks signal in all regions from ChIP-sequencing experiments in Figures 3D-E. (D) Genomic distribution of H3K27ac enriched peaks in *Hdac7<sup>+/-</sup>* and *Hdac7<sup>fl/-</sup>* pro-B cells determined by ChIP-seq experiments in Figures 3D-E. (E) Venn Diagram comparing genes enriched in H3K27ac epigenetic mark and genes detected as open regions by ATAC-seq in *Hdac7<sup>fl/-</sup>* pro-B cells compared to control pro-B cells. (F) Depth coverage of H3K27me3 peaks signal in all regions from ChIP-sequencing experiments in Figures 3F-G. (G) As in (D), but with gene regions enriched for H3K27me3 epigenetic mark. (H) Venn Diagram comparing genes enriched in H3K27me3 epigenetic mark from wild-type pro-B cells and genes detected as open regions by ATAC-seq in *Hdac7<sup>fl/-</sup>* pro-B cells compared to control pro-B cells. (H) H3K27ac and H3K27me3 ChIP-seq signal profile of HDAC7-deficient and control pro-B cells over the transcription factor

*Pax5* genomic sequence. **(I)** ChIP-qPCR data after immunoprecipitation with H3K9me3 antibody. Enrichment of *Tet2* promoter (left panel) and *Tet2* enhancer (right panel) regions is quantified as % of input. Data is represented as mean  $\pm$  SEM of n = 3. \*p < 0.05, unpaired T-test.

#### **Supplementary Figure 4. HDAC7 deficiency results in increased recruitment of TET2 and altered 5-hmC enrichment at B cell lineage inappropriate genes**

**(A)** Depth coverage of 5-hmC peaks signal in intergenic and promoter (TSS) regions from 5-hmC-sequencing experiments in Figures 4A-C. **(B)** Genome browser snapshot of 5-hmC peaks, ATAC-seq peaks and RNA-seq peaks at *FosB* promoter in wild-type pro-B and HDAC7-deficient pro-B and pre-B cells. **(C)** Analysis by RT-qPCR of inappropriate lineage genes *FosL2* and *FosB* in wild-type pro-B cells and HDAC7-deficient pro-B and pre-B cells. **(D)** RNA-seq signal profile of HDAC7-deficient pro-B and pre-B and control pro-B cells of *Itgb2* and *Cd69* genes. **(E)** Analysis of TET2 recruitment at other targets such as *FosL2*, *Ahnak* and *Itgb2* genes by ChIP-qPCR, quantified as % of input. **(F)** Schematic representation of the three experimental approaches used in gain and loss of function experiments in Figures 4H-J. Approach 1 uses primary pro-B cells from *Hdac7<sup>+/-</sup>* and *Hdac7<sup>fl/-</sup>* mice and approaches 2 and 3 use pre-B cell lines that transdifferentiate into macrophages upon  $\beta$ -estradiol treatment. Blue lines indicate the effects caused by the inhibition of *Tet2* expression through sh*Tet2* retroviral infection or HDAC7 induction by MSCV-7WT infection. TF=transcription factor. Data in panel (D) is represented as mean  $\pm$  SEM of n = 3. \*p < 0.05, unpaired T-test.

#### **Supplementary Figure 5. HDAC7 directs B cell-specific miRNA hydroxymethylation and expression patterns**

**(A)** Example of 5-hmC and open chromatin peaks enriched at aberrant miRNAs such as miR-29b and miR-99a from hMeDIP-seq and ATAC-seq experiments. **(B)** Example of 5-hmC and open chromatin enriched peaks at B-cell related miRNAs such as miR-150 and miR-181a from hMeDIP-seq and ATAC-seq experiments.

#### **Supplementary Figure 6. HDAC7 regulates 5-hydroxymethylation levels of transposable LINE-1 elements**

**(A)** Example of 5-hmC and open chromatin peaks enriched at LINE-1 associated regions from hMeDIP-seq and ATAC-seq experiments. **(B)** GO analysis of genes included in DNA repair geneset (from GSEA) that are down-regulated in *Hdac7<sup>fl/-</sup>* pro-B cells. **(C)** Table showing genes lists included in clusters from GO analysis from panel (B).

**Table S1.** Primer sequences used for RT-qPCR and ChIP qPCR experiments.

**Table S2.** Relative expression values of microRNAs showing differential expression profiles in control and *Hdac7<sup>fl/-</sup>* pro-B cells.

# Supplementary Figure 1

**A**

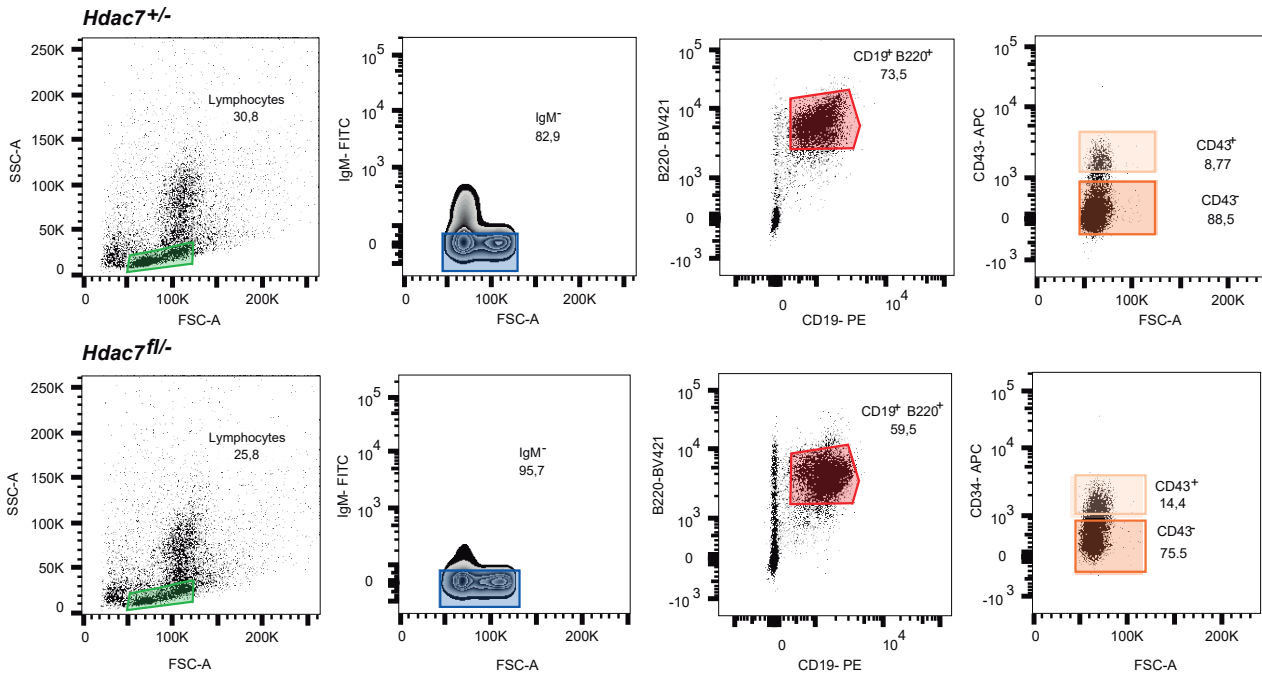

**B**

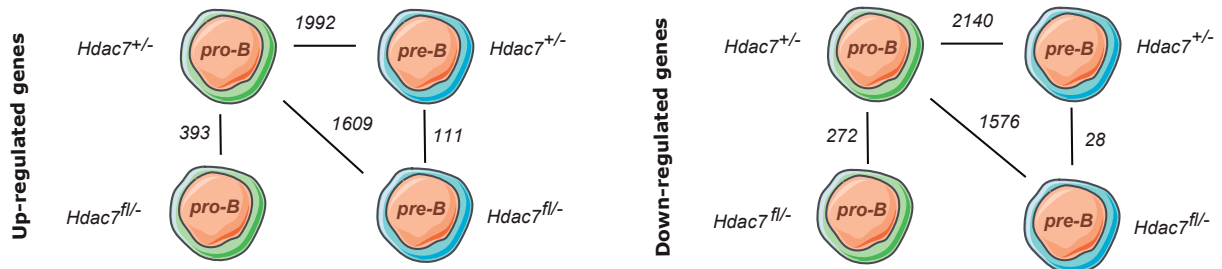

**C**

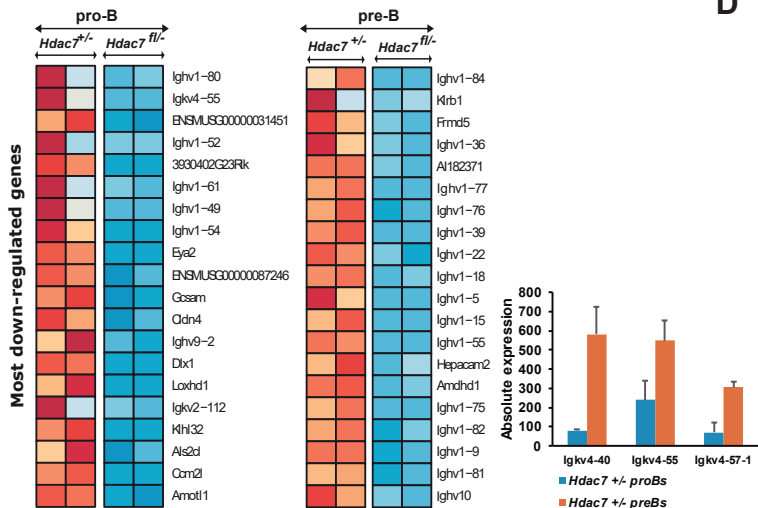

**D**

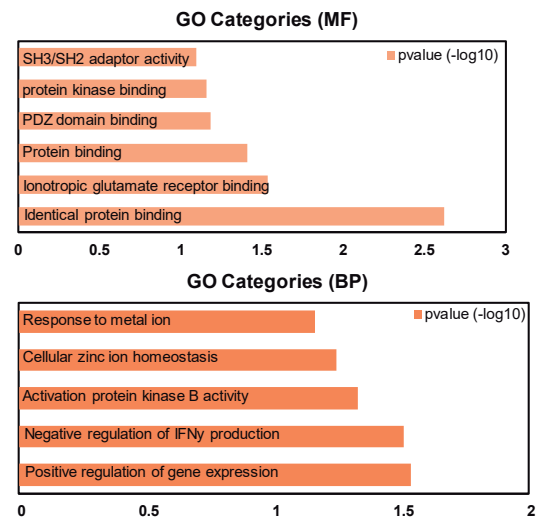

**E**

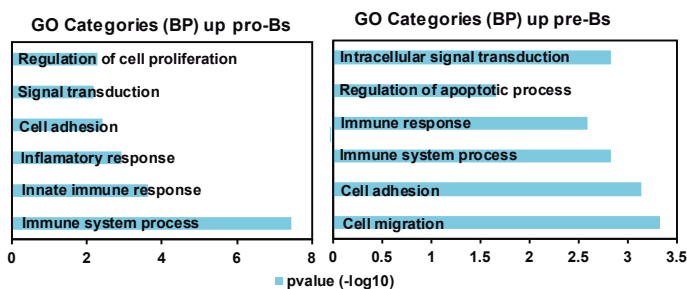

**F**

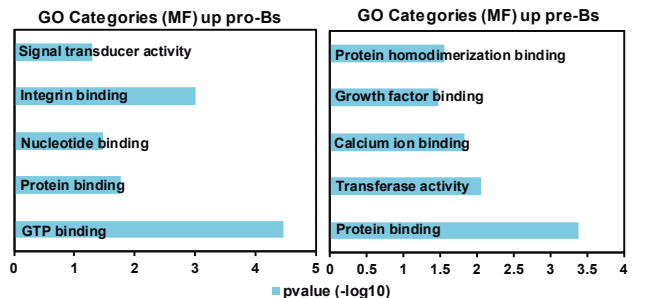

# Supplementary Figure 2

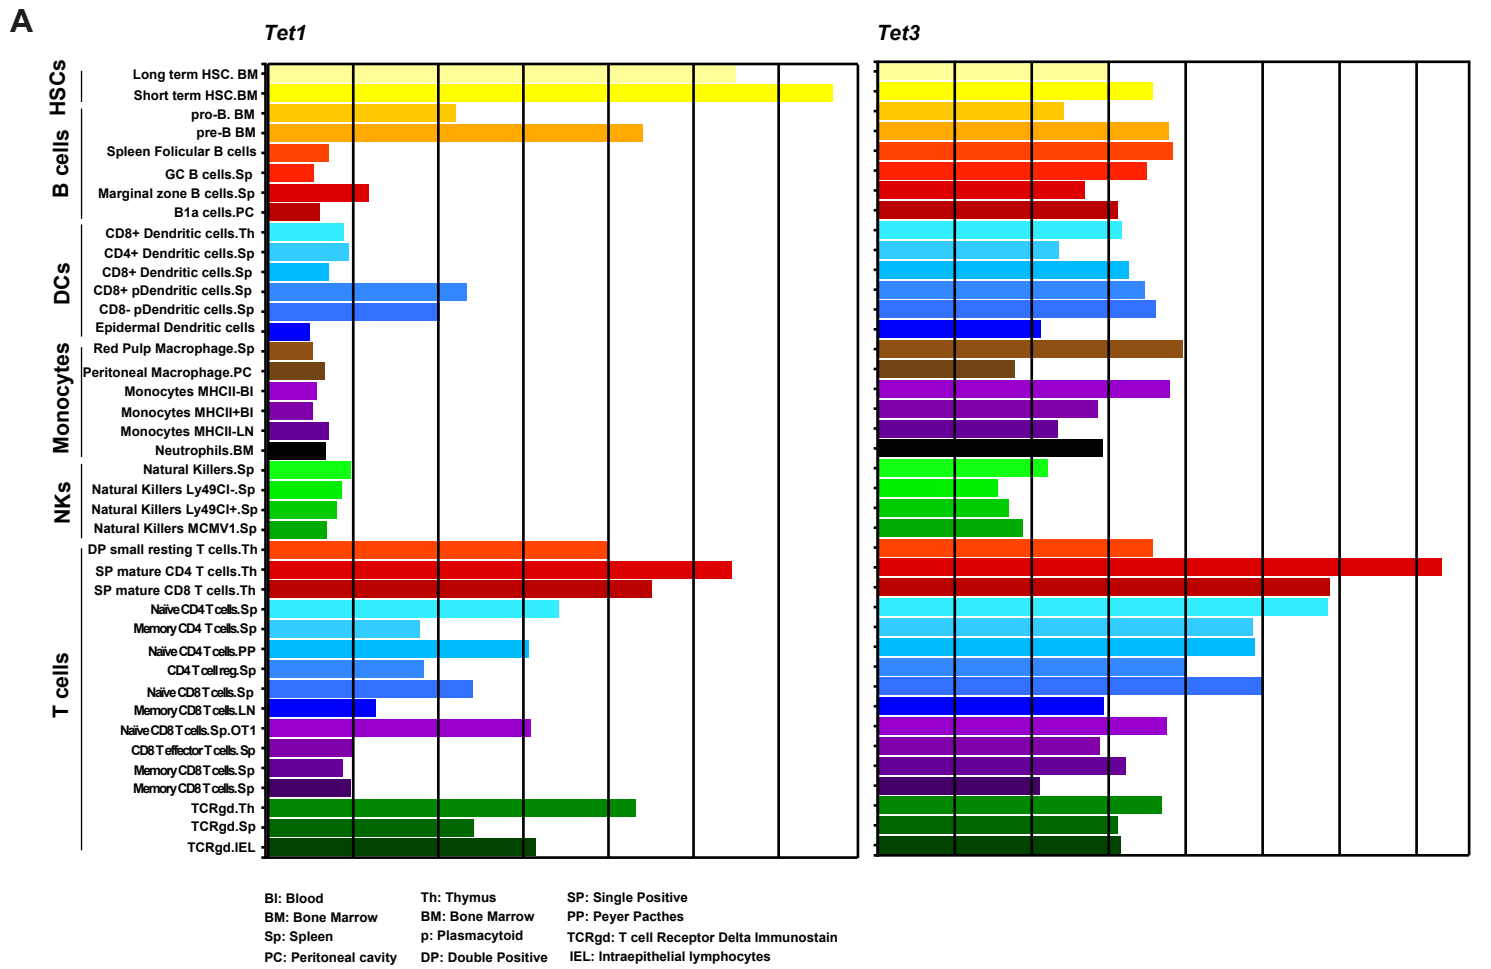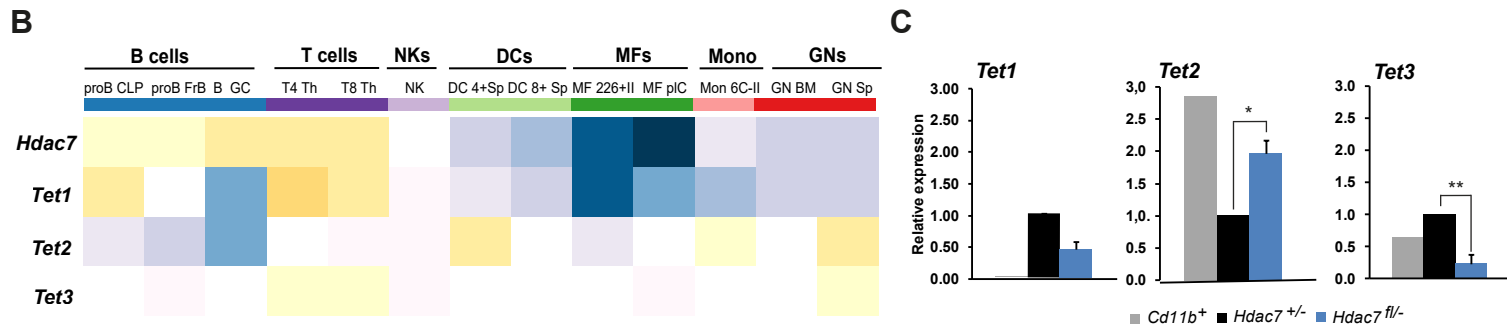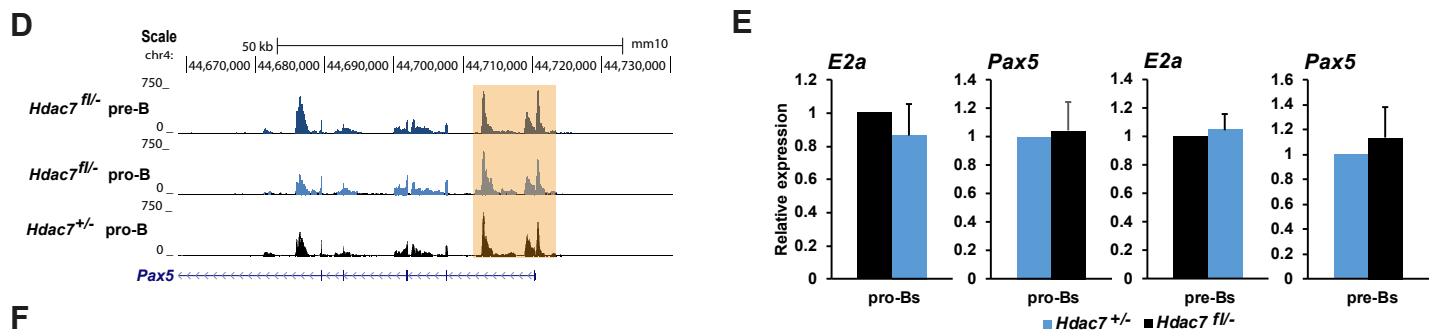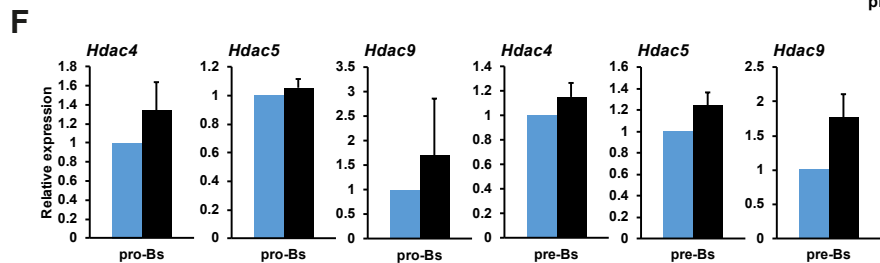

# Supplementary figure 3

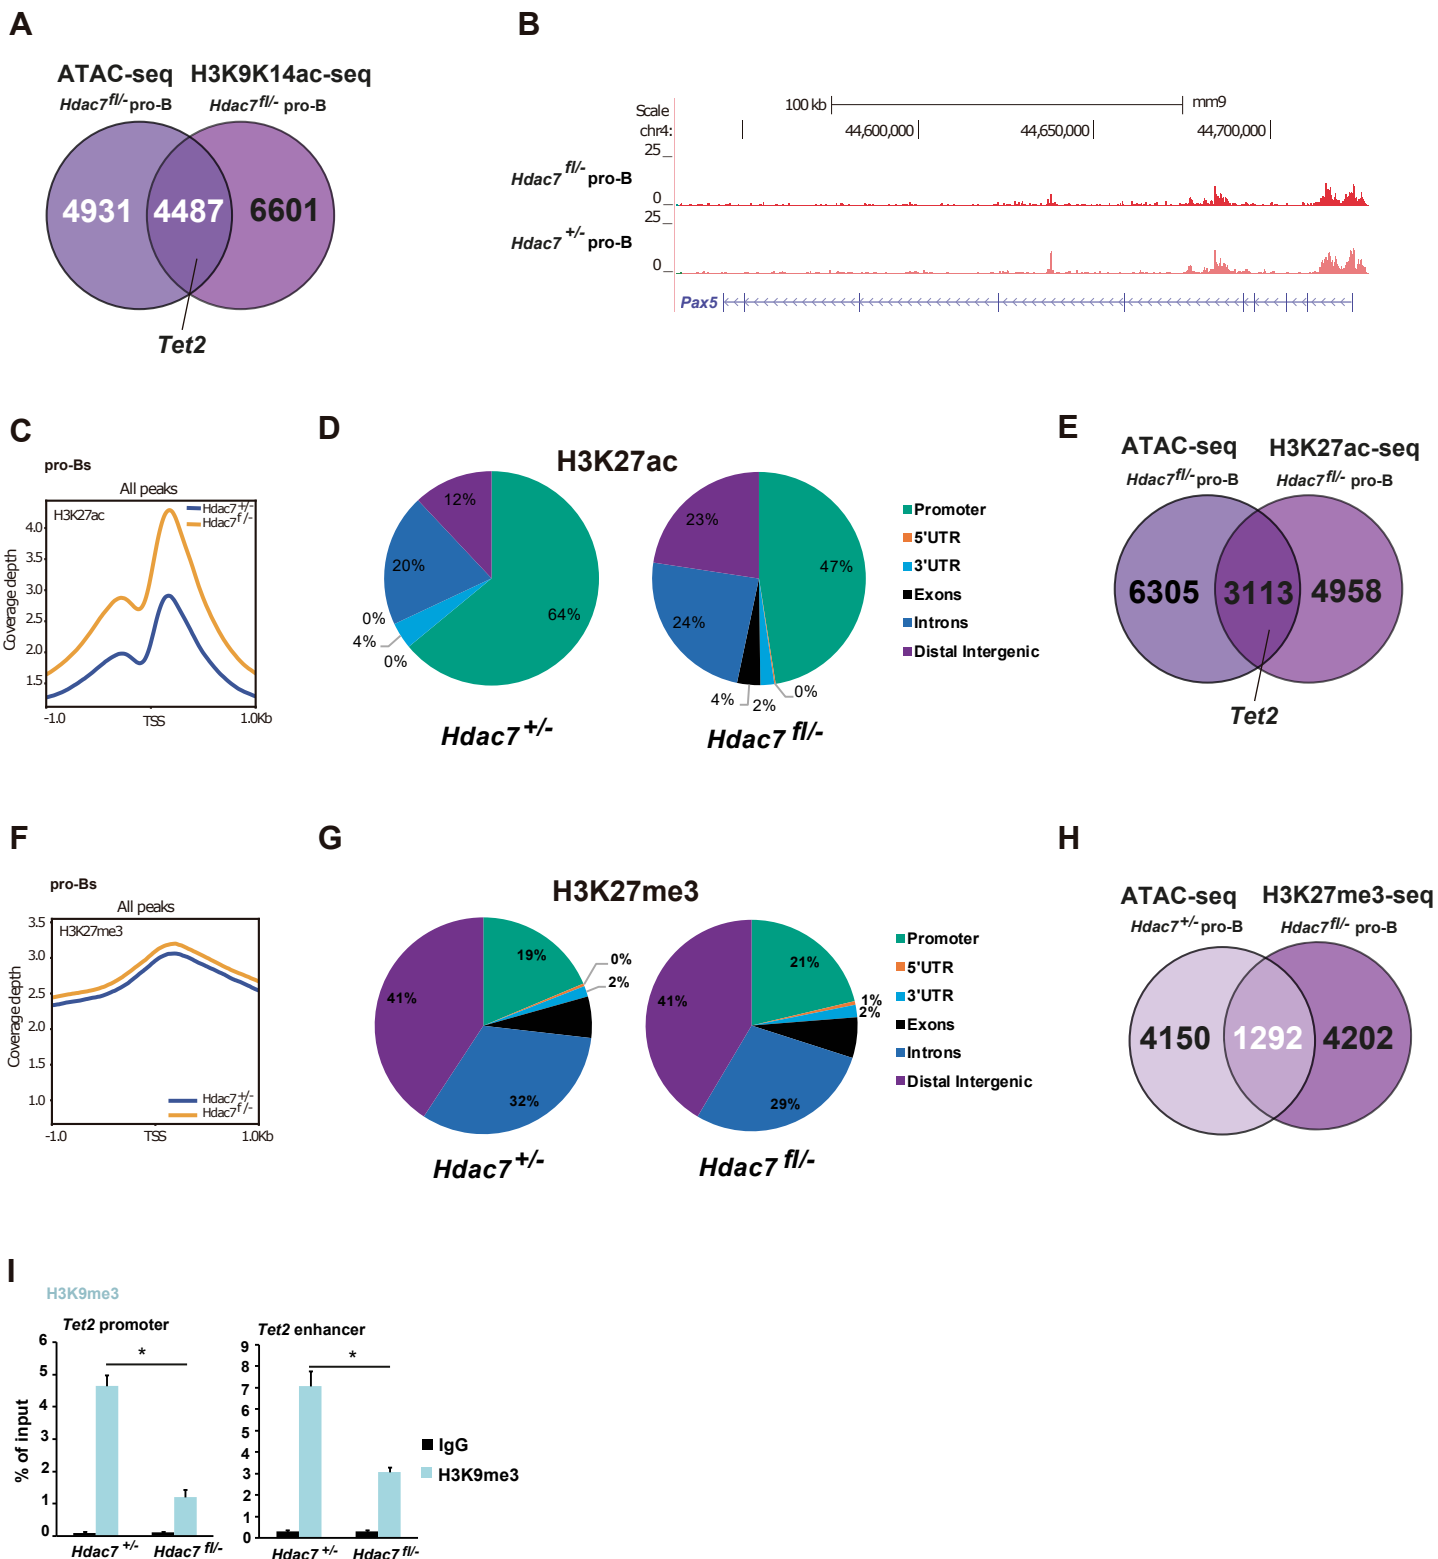

# Supplementary Figure 4

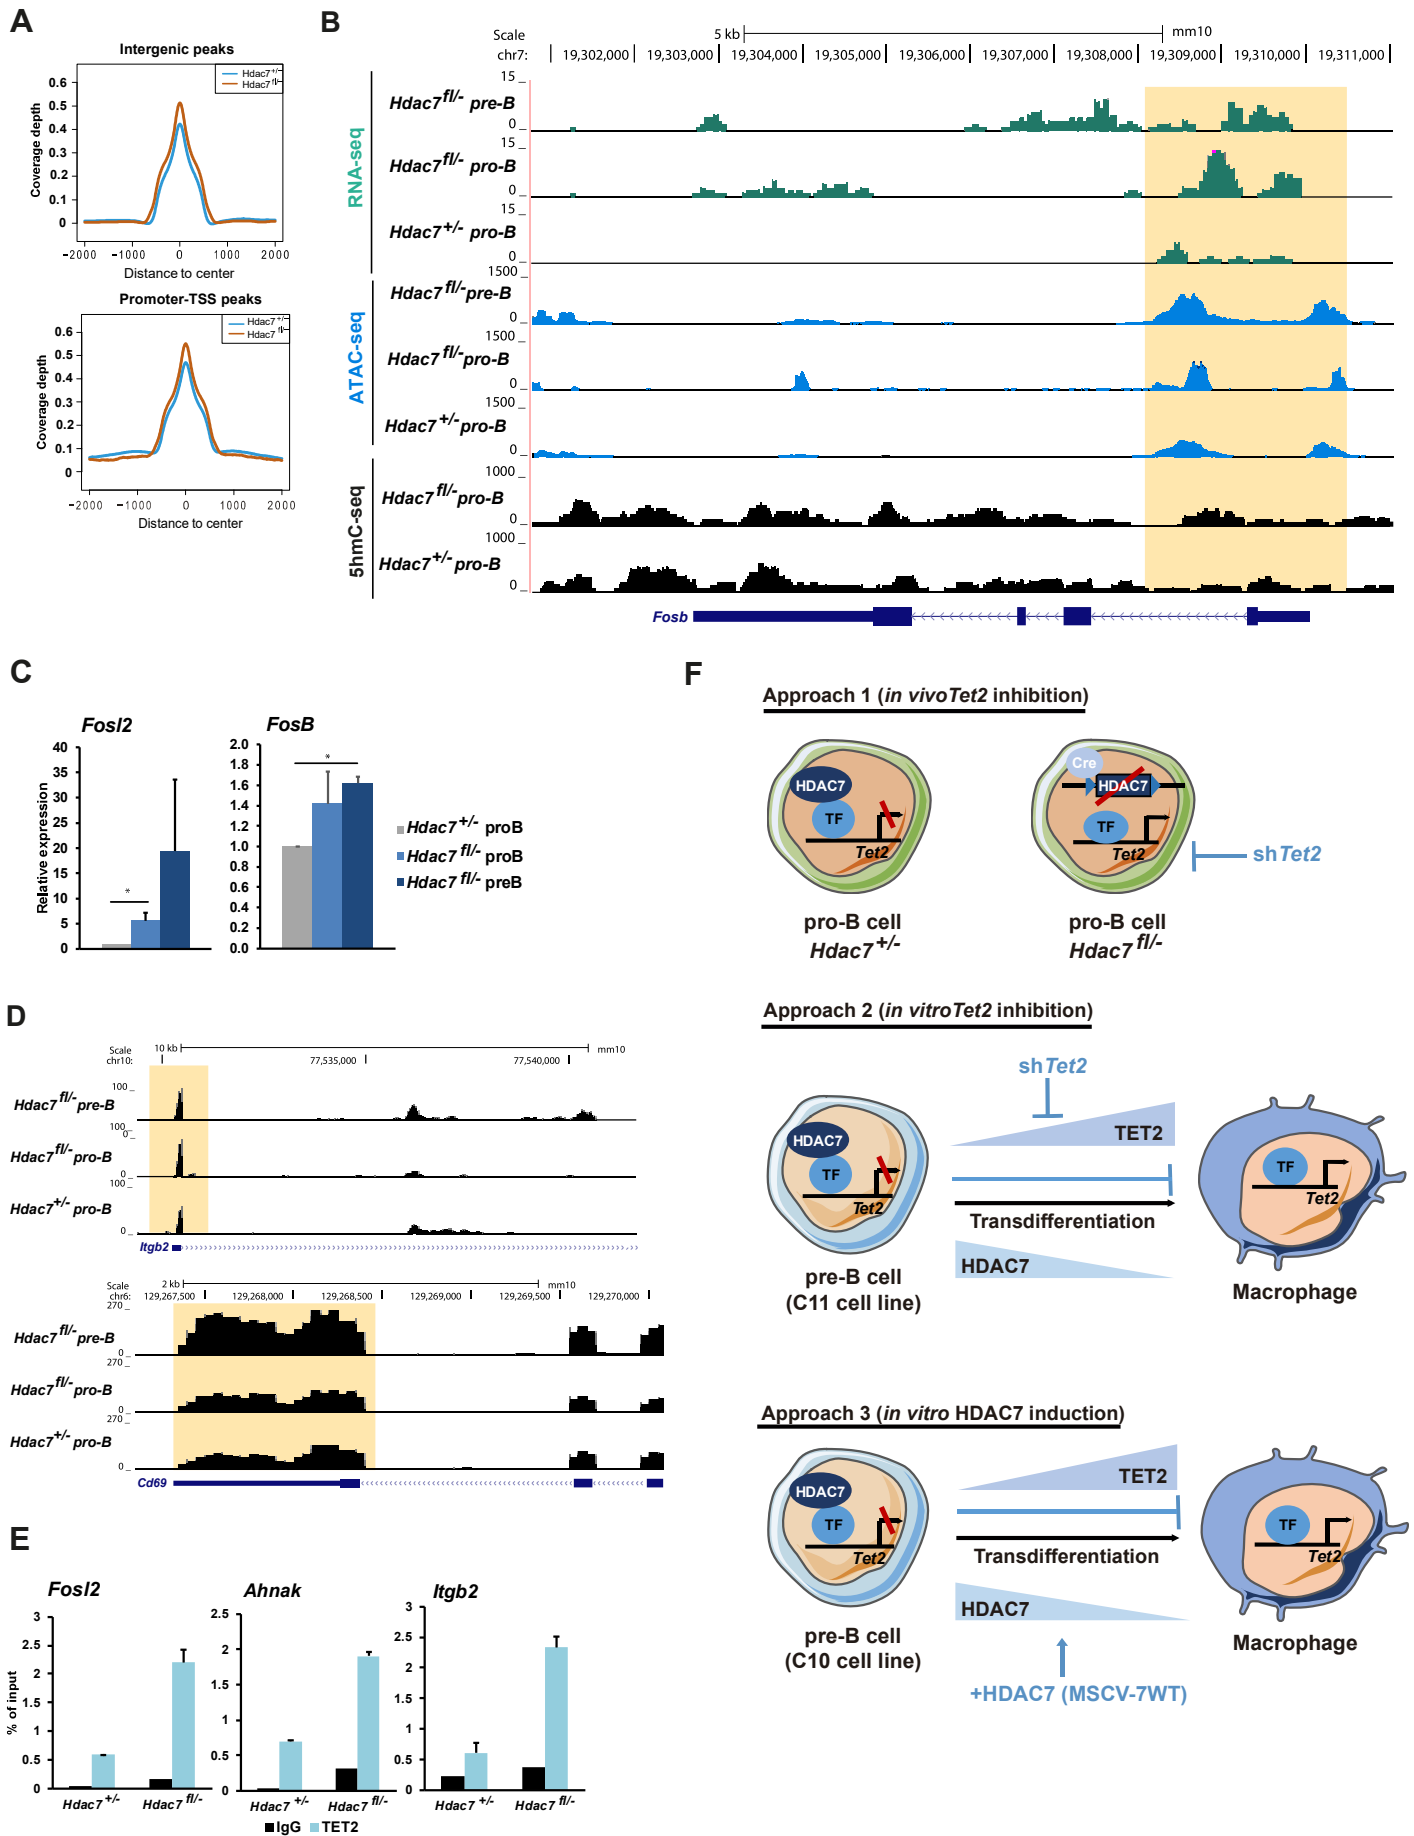

# Supplementary Figure 5

**A**

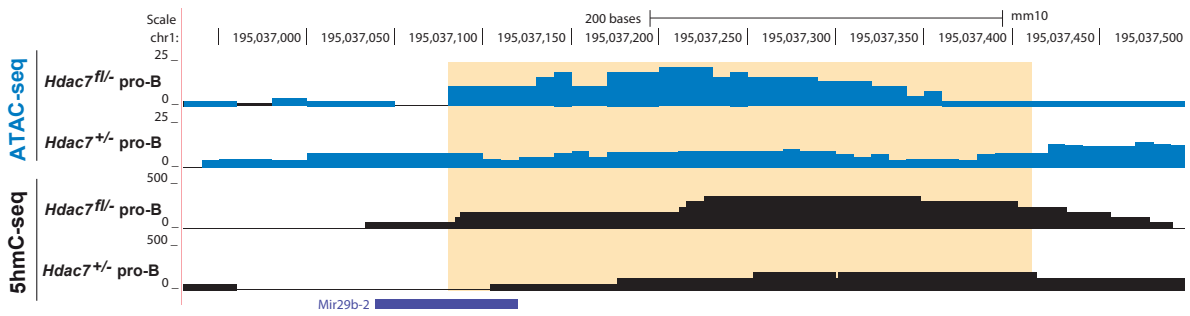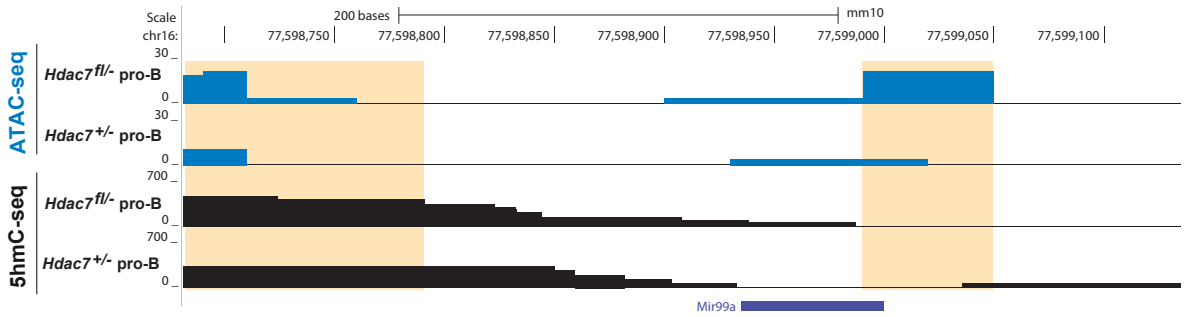

**B**

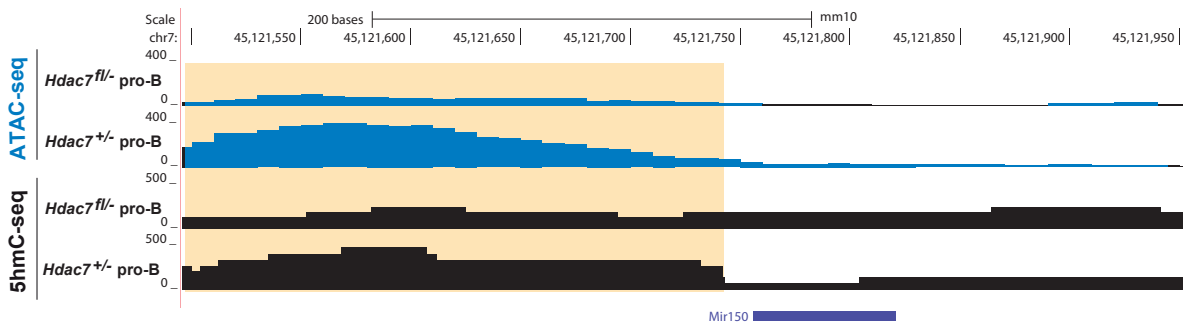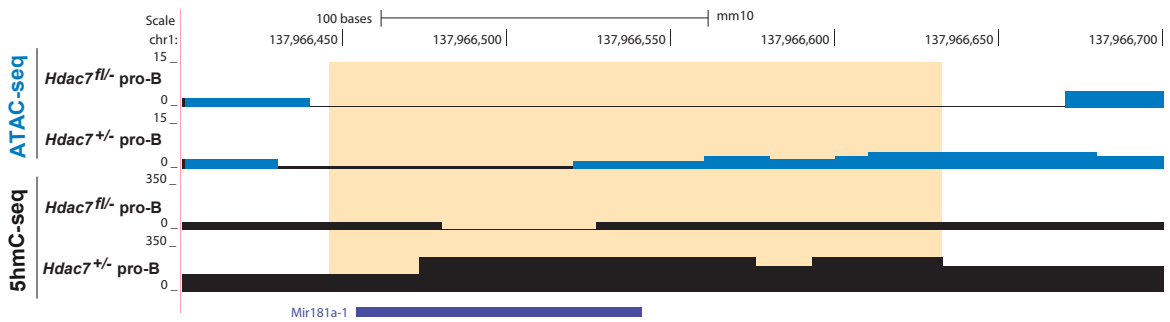



# Supplementary Figure 6

**A**

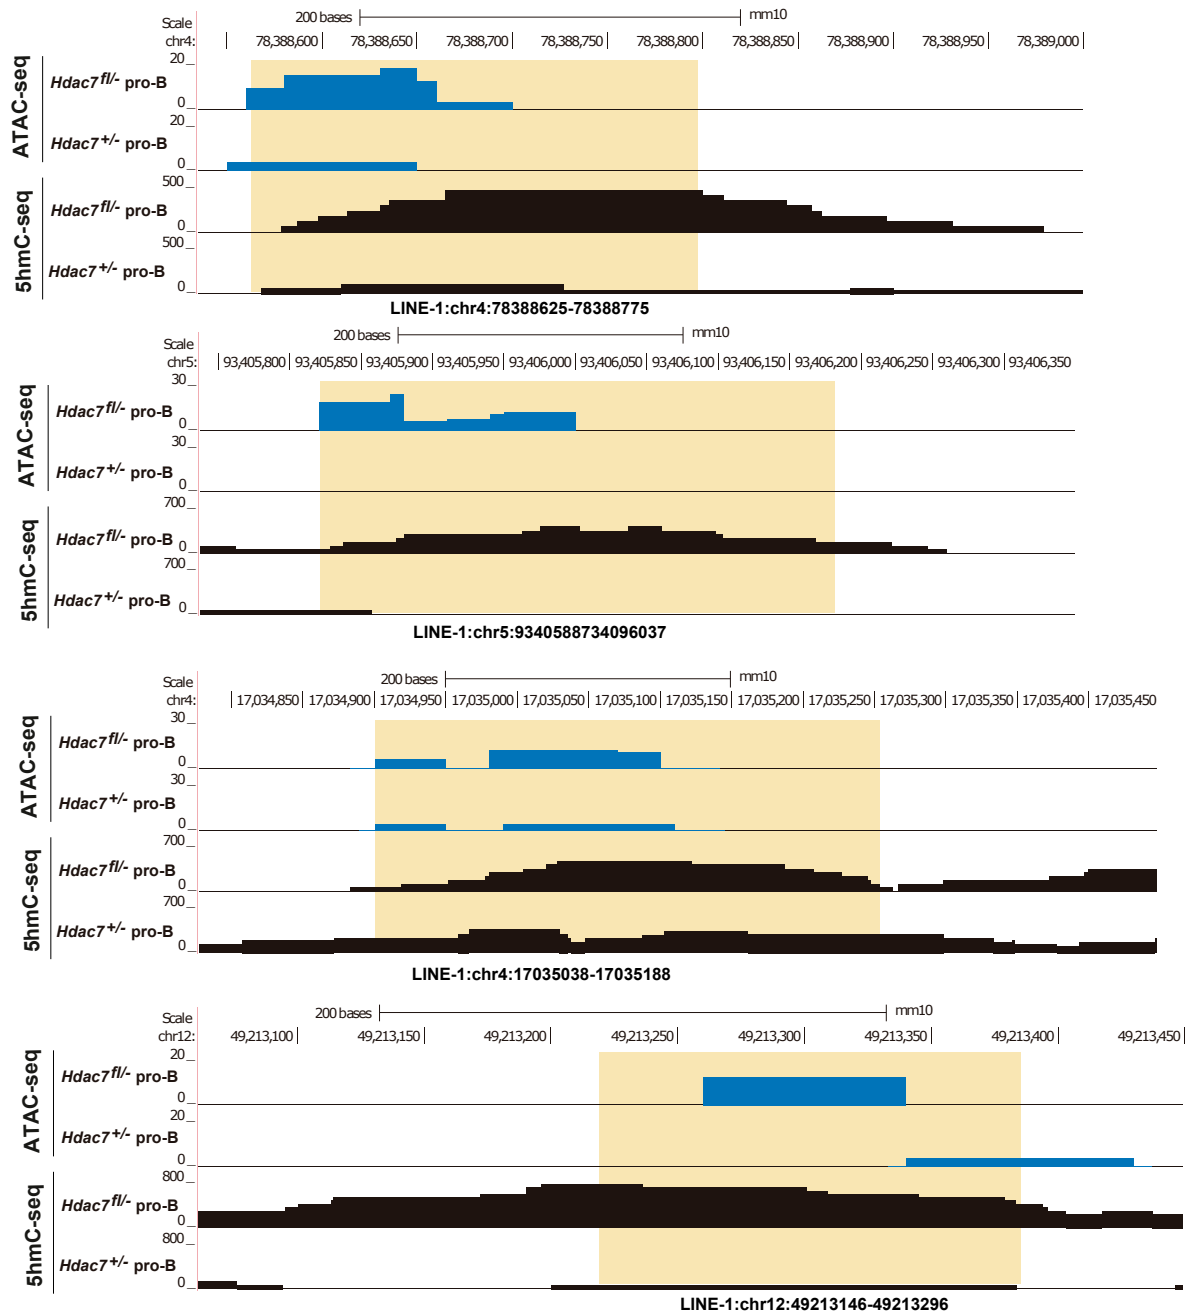

**B**

## GO analysis (KEGG pathways)

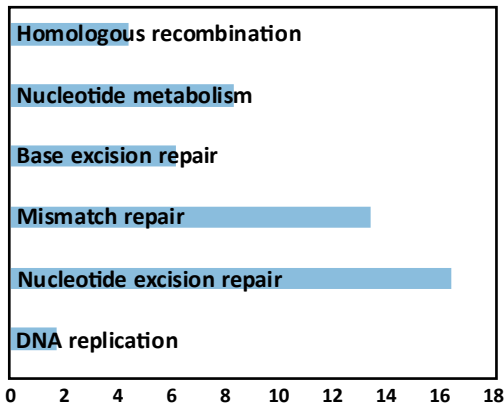

**C**

| Nucleotide excision repair | Mismatch repair | Base excision repair | Cellular response to DNA damage |
|----------------------------|-----------------|----------------------|---------------------------------|
| DDB1                       | LIG1            | FEN1                 | RAD51                           |
| ERCC2                      | POLD1/3         | LIG1                 | DDB1                            |
| ERCC8                      | PCNA            | POLD1/3              | ERCC2/5                         |
| GTF2H1/3                   | RCF3/4/5        | POLL                 | FEN1                            |
| PCNA                       | RPA2/3          | PCNA                 | GTF2H1/3                        |
| LIG1                       |                 |                      | POLD1                           |
| POLD1/3                    |                 |                      | POLL                            |
| RFC3/4/5                   |                 |                      | POLH                            |
| RPA2/3                     |                 |                      | PCNA                            |
|                            |                 |                      | SSRP1                           |

**Table S1- primer sequences**

| Name                  | Sequence                    | Purpose        | Source                                                                                                                 |
|-----------------------|-----------------------------|----------------|------------------------------------------------------------------------------------------------------------------------|
| Tet1 RTqPCR Fw        | ACAAGCAGATGGCTCCAGTT        | Real time qPCR | Kallin et al, Moll Cell 2012                                                                                           |
| Tet1 RTqPCR Rv        | GCAACAGGTGACACCAGAGA        | Real time qPCR | Kallin et al, Moll Cell 2012                                                                                           |
| Tet2 RTqPCR Fw        | ATCCAAACCGAAGCTGAATG        | Real time qPCR | Kallin et al, Moll Cell 2012                                                                                           |
| Tet2 RTqPCR Rv        | CTTGCCCTACCACCGTTTTTA       | Real time qPCR | Kallin et al, Moll Cell 2012                                                                                           |
| Tet3 RTqPCR Fw        | TCCGATTGAGAAGGTCATC         | Real time qPCR | Kallin et al, Moll Cell 2012                                                                                           |
| Tet3 RTqPCR Rv        | TCCTCCAGTGTGTCTTCG          | Real time qPCR | Kallin et al, Moll Cell 2012                                                                                           |
| Pax5 RTqPCR Fw        | GCCTGGGAGTGAATTTTCTGGA      | Real time qPCR | This paper                                                                                                             |
| Pax5 RTqPCR Rv        | GGGCTGCAGGGCTGTAATAGTAT     | Real time qPCR | This paper                                                                                                             |
| E2a RTqPCR Fw         | AGGAAATCGCATCAGTAGCC        | Real time qPCR | This paper                                                                                                             |
| E2a RTqPCR Rv         | AGGGACAGCACCTCATCTGT        | Real time qPCR | This paper                                                                                                             |
| Gapdh RTqPCR Fw       | ACATCTCACTCAAGATTGTCAGCA    | Real time qPCR | Dawlaty et al, Develop Cell 2014                                                                                       |
| Gapdh RTqPCR Rv       | ATGGCATGGACTGTGGTCAT        | Real time qPCR | Dawlaty et al, Develop Cell 2014                                                                                       |
| FosL2 RTqPCR Fw       | TGGAGTGATCAAGACCATCG        | Real time qPCR | Kallin et al, Moll Cell 2012                                                                                           |
| FosL2 RTqPCR Rv       | GTTTCTCTCCCTCCGGATTC        | Real time qPCR | Kallin et al, Moll Cell 2012                                                                                           |
| Jun RTqPCR Fw         | ACGACCTTCTACGACGATGC        | Real time qPCR | Kim et al, PNAS 2013                                                                                                   |
| Jun RTqPCR Rv         | CCAGGTTCAAGGTCATGCTC        | Real time qPCR | Kim et al, PNAS 2013                                                                                                   |
| L1-ORFp1 RTqPCR Fw    | ACTCAAAGCGAGGCAACACTAGA     | Real time qPCR | de la Rica et al, Genome Biol 2016                                                                                     |
| L1-ORFp1 RTqPCR Rv    | GTTCCAGATTTCTTTCCTAGGGTTTC  | Real time qPCR | de la Rica et al, Genome Biol 2016                                                                                     |
| L1MdGf RTqPCR Fw      | TGGAATACAGAGTGCCAGCC        | Real time qPCR | de la Rica et al, Genome Biol 2016                                                                                     |
| L1MdGf RTqPCR Rv      | GTGCTCTCACCCAGGAAGGTG       | Real time qPCR | de la Rica et al, Genome Biol 2016                                                                                     |
| L1MdA RTqPCR Fw       | TCTGGTGAGTGGAACACAGC        | Real time qPCR | de la Rica et al, Genome Biol 2016                                                                                     |
| L1MdA RTqPCR Rv       | AGTCTCGAGTGGAGCGGAAG        | Real time qPCR | de la Rica et al, Genome Biol 2016                                                                                     |
| miR-125b-5p Fw        | GCAGTCCCTGAGACCCT           | Real time qPCR | miRprimer<br>( <a href="https://sourceforge.net/projects/mirprimer/">https://sourceforge.net/projects/mirprimer/</a> ) |
| miR-125b-5p Rv        | CGAGTTTTTTTTTTTTTTTTCACAAGT | Real time qPCR | miRprimer software (same source)                                                                                       |
| miR-34a-5p Fw         | GCAGTGGCAGTGTCTTAG          | Real time qPCR | miRprimer software (same source)                                                                                       |
| miR-34a-5p Rv         | GGTCCAGTTTTTTTTTTTTTTTACAAC | Real time qPCR | miRprimer software (same source)                                                                                       |
| miR-28a Fw            | CAGAAGGAGCTCACAGTCT         | Real time qPCR | miRprimer software (same source)                                                                                       |
| miR-28a Rv            | GGTCCAGTTTTTTTTTTTTTTTCTCA  | Real time qPCR | miRprimer software (same source)                                                                                       |
| miR-150-5p Fw         | CTCCAACCCTGTACCA            | Real time qPCR | miRprimer software (same source)                                                                                       |
| miR-150-5p Rv         | GGTCCAGTTTTTTTTTTTTTTTCACT  | Real time qPCR | miRprimer software (same source)                                                                                       |
| miR-142-3p Fw         | CGAGTGTAGTGTTCCT            | Real time qPCR | miRprimer software (same source)                                                                                       |
| miR-142-3p Rv         | GGTCCAGTTTTTTTTTTTTTTTCCA   | Real time qPCR | miRprimer software (same source)                                                                                       |
| miR-181a-5p Fw        | CATTCAACGCTGTCTGGT          | Real time qPCR | miRprimer software (same source)                                                                                       |
| miR-181a-5p Rv        | GGTCCAGTTTTTTTTTTTTTTTACTCA | Real time qPCR | miRprimer software (same source)                                                                                       |
| Hdac4 Fw              | GCCATCTGTGATGCTTCTGA        | Real time qPCR | This paper                                                                                                             |
| Hdac4 Rv              | ATTGGCATTGGGTCTCTGAT        | Real time qPCR | This paper                                                                                                             |
| Hdac5 Fw              | AGCCATGGGATTCTGCTTCT        | Real time qPCR | This paper                                                                                                             |
| Hdac5 Rv              | AGTCCACGATGAGGACCTTG        | Real time qPCR | This paper                                                                                                             |
| Hdac9 Fw              | CCCCTATGGGAGATGTTGAG        | Real time qPCR | This paper                                                                                                             |
| Hdac9 Rv              | CAATGCATCAAATCCAGCAG        | Real time qPCR | This paper                                                                                                             |
| Tet2-promoter ChIP Fw | CAAGCTTGAGGCTGGGAGAA        | ChIP-qPCR      | This paper                                                                                                             |
| Tet2-promoter ChIP Rv | CAGTCAGGCTGCTATCGAGT        | ChIP-qPCR      | This paper                                                                                                             |
| Tet2-enhancer ChIP Fw | CTGAGAGCATCTCCAGGTC         | ChIP-qPCR      | This paper                                                                                                             |
| Tet2-enhancer ChIP Rv | GGAGTGAGGCAATACCAGGA        | ChIP-qPCR      | This paper                                                                                                             |

**Table S1- primer sequences**

|                       |                           |             |                                       |
|-----------------------|---------------------------|-------------|---------------------------------------|
| L1-chr10-ChIP Fw      | GTTGACCCCGTGTCAGTCTT      | ChIP-qPCR   | This paper                            |
| L1-chr10-ChIP Rv      | GGCGACCTCAACTGAATGAT      | ChIP-qPCR   | This paper                            |
| Spi1 promoter ChIP Fw | GTAGCGCAAGAGATTTATGCAAAC  | ChIP-qPCR   | This paper                            |
| Spi1 promoter ChIP Rv | GCACAAGTTCCTGATTTTATCGAA  | ChIP-qPCR   | This paper                            |
| miR-125b-Tet2-ChIP Fw | TTCCCAAGCTGTCCGTTTAC      | ChIP-qPCR   | This paper                            |
| miR-125b-Tet2-ChIP Rv | TGGTGGTTTATGCCGAGAAT      | ChIP-qPCR   | This paper                            |
| miR-34a-Tet2-ChIP Fw  | AGCCTCTCCATCTTCCTGTG      | ChIP-qPCR   | This paper                            |
| miR-34a-Tet2-ChIP Rv  | CGTTGCTGACCTCTGACCTT      | ChIP-qPCR   | This paper                            |
| Jun ChIP Fw           | GAGGTTGGGGGCTACTTTTC      | ChIP-qPCR   | This paper                            |
| Jun ChIP Rv           | TGTCCTGCCAGTGTTTGTA       | ChIP-qPCR   | This paper                            |
| Itgb2 ChIP Fw         | CTACAAGCCCCTCCCTCTCT      | ChIP-qPCR   | Kallin et al, Moll Cell 2012          |
| Itgb2 ChIP Rv         | CCCAGGAGGAAGTTGAGTGA      | ChIP-qPCR   | Kallin et al, Moll Cell 2012          |
| Jun 5hmC Fw           | AAAGTCTGCCGCCAATAG        | hMeDIP-qPCR | This paper                            |
| Jun 5hmC Rv           | GAACTTGACTGGTTGCGACA      | hMeDIP-qPCR | This paper                            |
| Fosl2 5hmC Fw         | GGAGCTTGACAGAGCAGAAAC     | hMeDIP-qPCR | Kallin et al, Moll Cell 2012          |
| Fosl2 5hmC Rv         | CCTAACCAAGGCAGACAGGA      | hMeDIP-qPCR | Kallin et al, Moll Cell 2012          |
| L1 chr3 5hmC Fw       | TTGTGCTTTTTCTTGGGCTA      | hMeDIP-qPCR | This paper                            |
| L1 chr3 5hmC Rv       | AGTTTTCCCTCCCTCTGCTC      | hMeDIP-qPCR | This paper                            |
| L1 chr10 5hmC Fw      | AAACCCACAGAATTGGAACG      | hMeDIP-qPCR | This paper                            |
| L1 chr10 5hmC Rv      | CCTCGTCTTTTCCTTCACTTTG    | hMeDIP-qPCR | This paper                            |
| L1 chr1 5hmC Fw       | AGCCTCCTTGATGTTCTCTT      | hMeDIP-qPCR | This paper                            |
| L1 chr1 5hmC Rv       | TGAGAGCACAAACACTAAGCAA    | hMeDIP-qPCR | This paper                            |
| $\beta$ -globin Fw    | AAGGTATGAGAATCCAGGCAG     | MNase, qPCR | Vazquez et al, Nucleic Acids Res 2019 |
| $\beta$ -globin Rv    | GCCAAAACAATCACCAGCAC      | MNase, qPCR | Vazquez et al, Nucleic Acids Res 2019 |
| L1mdA Fw              | CAAACCCCTTCCACTCCACTCGAGC | MNase, qPCR | Vazquez et al, Nucleic Acids Res 2019 |
| L1mdA Rv              | CCTTCGCCATCTGGTAATC       | MNase, qPCR | Vazquez et al, Nucleic Acids Res 2019 |

**Table S2. Relative expression values of microRNAs showing differential expression profiles in control and *Hdac7*<sup>fl/-</sup> pro-B cells.**

| miRNA Name      | Wt1     | Wt2  | Ko1     | Ko2  | Mean Wt | Mean Ko | FC    | Log2FC |
|-----------------|---------|------|---------|------|---------|---------|-------|--------|
| mmu-miR-141-3p  | 0.03518 | 0.05 | 0.01914 | 0.02 | 0.04394 | 0.02011 | 2.18  | 1.13   |
| mmu-miR-150-5p  | 3.95758 | 6.91 | 1.27930 | 1.42 | 5.43628 | 1.34796 | 4.03  | 2.01   |
| mmu-miR-503-5p  | 3.14987 | 0.02 | 0.15820 | 0.00 | 1.58459 | 0.07981 | 19.85 | 4.31   |
| mmu-miR-125p-5p | 0.00243 | 0.01 | 0.02324 | 0.06 | 0.00708 | 0.04114 | 0.22  | -2.18  |
| mmu-mi125b-5pR- | 0.00776 | 0.00 | 0.05818 | 0.08 | 0.00505 | 0.07002 | 0.07  | -3.79  |
| mmu-miR-126a-3p | 0.01418 | 0.04 | 0.07275 | 0.17 | 0.02514 | 0.12053 | 0.21  | -2.26  |
| mmu-miR-196b-5p | 0.00134 | 0.00 | 0.00777 | 0.02 | 0.00102 | 0.01587 | 0.06  | -3.96  |
| mmu-miR-214-3p  | 0.00050 | 0.00 | 0.01465 | 0.00 | 0.00047 | 0.00868 | 0.05  | -4.20  |
| mmu-miR-29b-5p  | 0.31845 | 0.55 | 1.93672 | 1.63 | 0.43660 | 1.78306 | 0.24  | -2.03  |
| mmu-miR-337-3p  | 0.00112 | 0.00 | 0.00075 | 0.03 | 0.00134 | 0.01552 | 0.09  | -3.54  |
| mmu-miR-34a-5p  | 0.00643 | 0.02 | 0.33496 | 0.13 | 0.01142 | 0.23492 | 0.05  | -4.36  |
| mmu-miR-465c-5p | 0.00044 | 0.00 | 0.03096 | 0.07 | 0.00032 | 0.04874 | 0.01  | -6.77  |
| mmu-miR-466d-3p | 0.01122 | 0.02 | 0.12842 | 0.35 | 0.01366 | 0.24153 | 0.07  | -3.81  |
| mmu-miR-667-3p  | 0.00199 | 0.00 | 0.00598 | 0.01 | 0.00166 | 0.00769 | 0.22  | -2.21  |
| mmu-miR-760-3p  | 0.00337 | 0.00 | 0.02158 | 0.02 | 0.00265 | 0.02143 | 0.12  | -3.02  |
| mmu-miR-99a-5p  | 0.00645 | 0.00 | 0.04043 | 0.07 | 0.00417 | 0.05587 | 0.07  | -3.75  |
